# Supplementary material for: The molecular genetic analysis of the expanding pachyonychia congenita case collection
Source: PubMed Central journal article supplement (PMC4282083; doi:10.1111/bjd.12958), 2014-08-06

Supplementary Figure 1

(a) K16 wt

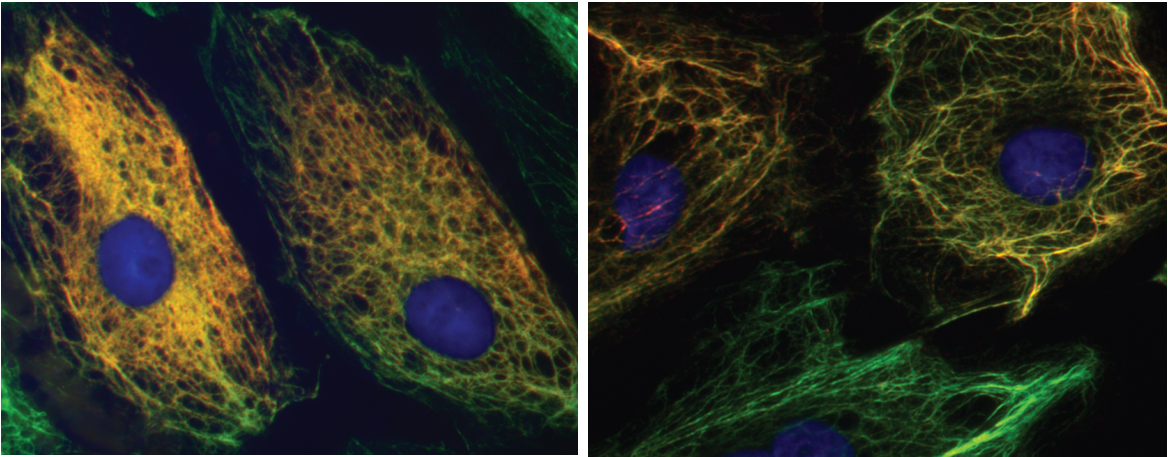

(b) K16 p. Arg418Cys

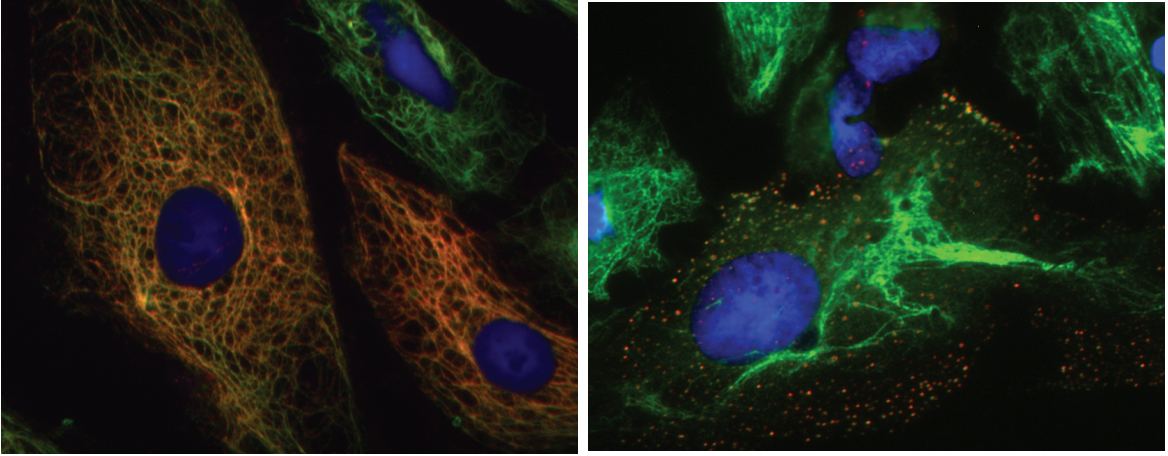

(c) K16 p.Arg418Pro

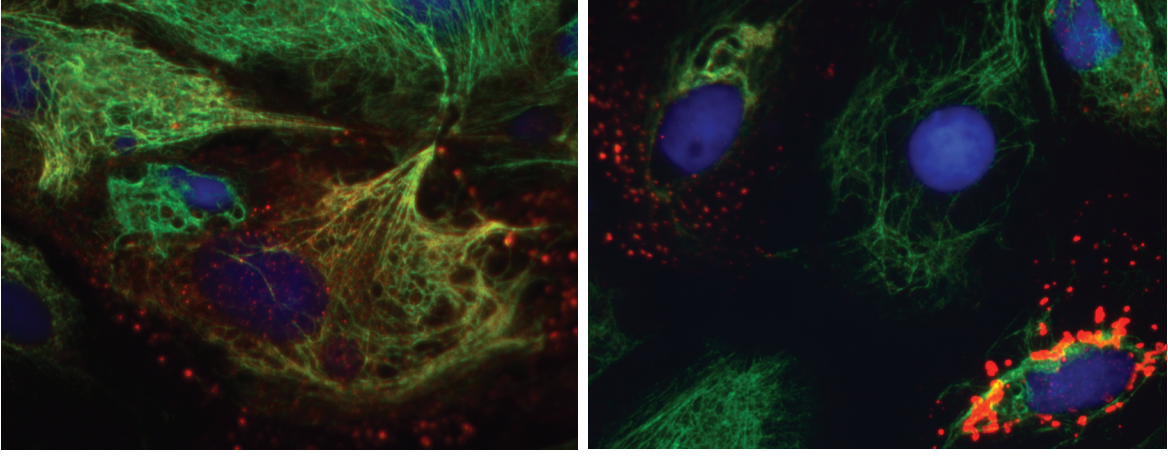

Supplement: bjd0171-0343-SD1.pdf [file bjd0171-0343-SD1.pdf]
